# Supplementary material for: Direct storage of holes in ultrathin Ni(OH)2 on Fe2O3 photoelectrodes for integrated solar charging battery-type supercapacitors
Source: Royal Society of Chemistry journal article supplement (doi:10.1039/c8ta08384c), 2018-01-01
Supplement: c8ta08384c1.pdf [file c8ta08384c1.pdf]

## Supplementary information

### Direct Storage of Holes in Ultrathin Ni(OH)<sub>2</sub> on Fe<sub>2</sub>O<sub>3</sub> Photoelectrodes for Integrated Solar Charging Battery-type Supercapacitors

Kaijian Zhu <sup>a</sup>, Guoxiang Zhu <sup>b</sup>, Jun Wang <sup>b</sup>, Jixin Zhu <sup>a</sup>, Gengzhi Sun <sup>a</sup>, Yao Zhang <sup>a</sup>,  
Ping Li <sup>a</sup>, Yongfa Zhu <sup>b</sup>, Wenjun Luo\* <sup>a,c</sup>, Zhigang Zou <sup>c</sup>, Wei Huang <sup>a</sup>

<sup>a</sup> Key Laboratory of Flexible Electronics (KLOFE) & Institute of Advanced Materials (IAM), Jiangsu National Synergetic Innovation Center for Advanced Materials (SICAM), Nanjing Tech University (NanjingTech), 30 South Puzhu Road, Nanjing 211816, P. R. China

<sup>b</sup> Department of Chemistry, Tsinghua University, Beijing 100084, P. R. China

<sup>c</sup> Eco-materials and Renewable Energy Research Center (ERERC), National Laboratory of Solid State Microstructures and College of Engineering and Applied Science, Nanjing University, Nanjing 210093, P. R. China

\*E-mail: iamwjluo@njtech.edu.cn

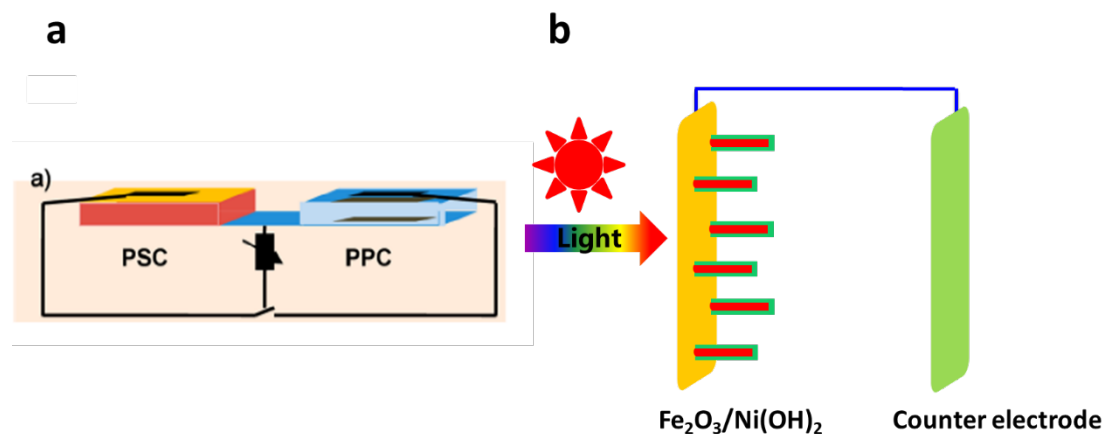

**Fig. S1** Diagrammatic sketches of (a) a solar cell + supercapacitor<sup>1</sup> and (b) a photoelectrochemical supercapacitor

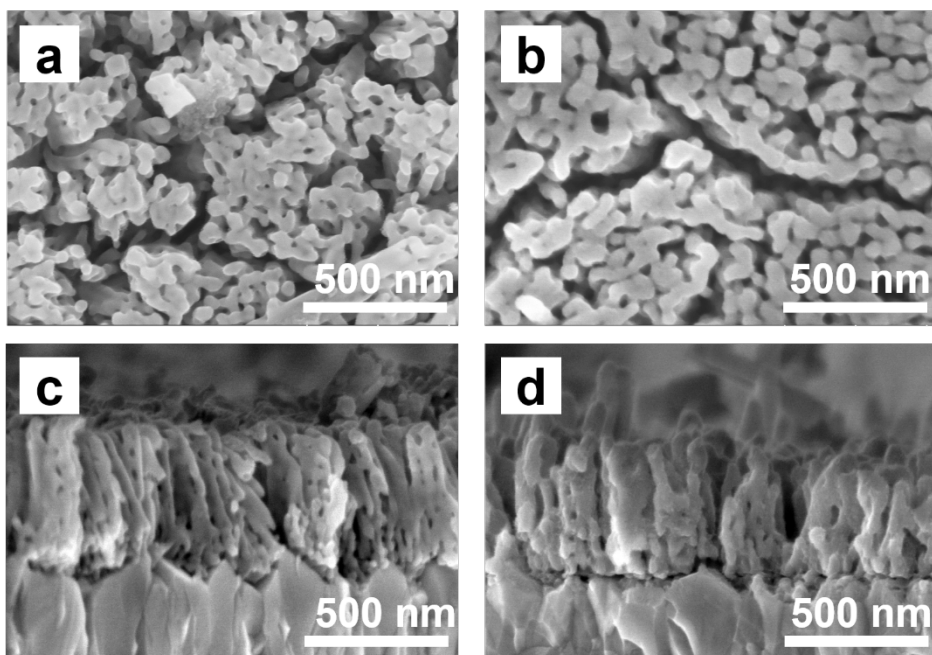

**Fig. S2** Surface and cross-section SEM images of bare  $\text{Fe}_2\text{O}_3$  (a, c) and  $\text{Fe}_2\text{O}_3@$  $\text{Ni}(\text{OH})_2$  with deposition time of  $\text{Ni}(\text{OH})_2$  for 10 min (b, d)

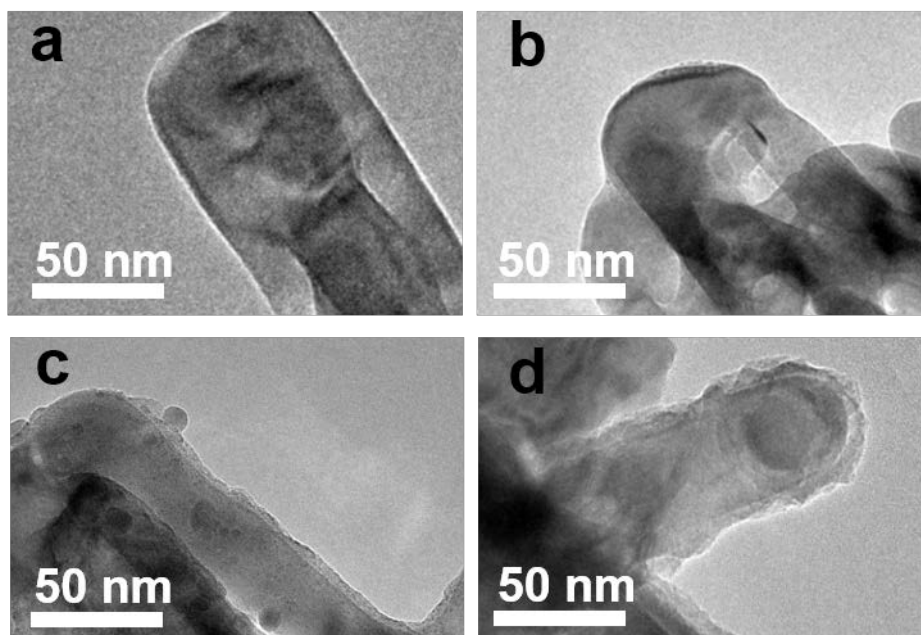

**Fig. S3** TEM images of bare  $\text{Fe}_2\text{O}_3$  (a) and  $\text{Fe}_2\text{O}_3@$  $\text{Ni}(\text{OH})_2$  with different deposition time of  $\text{Ni}(\text{OH})_2$  for 3 min (b), 5 min (c) and 10 min (d).

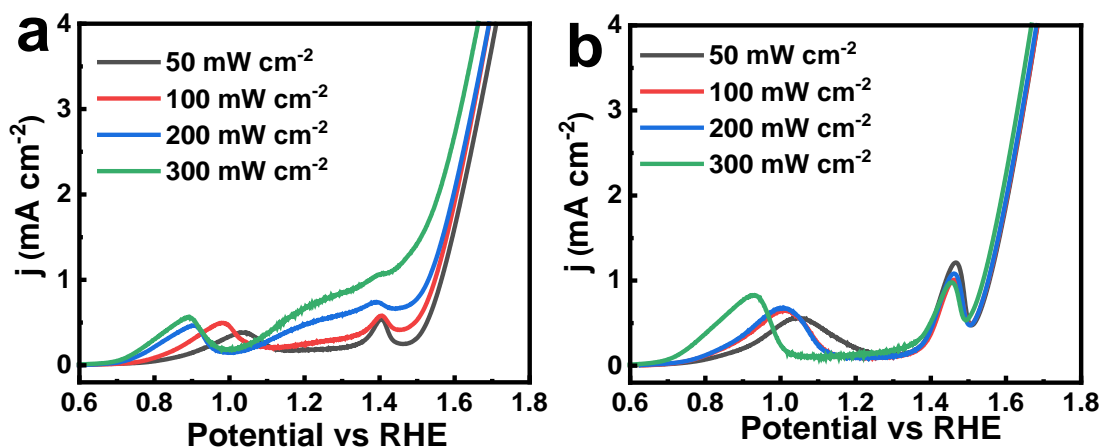

**Fig. S4** Photocurrent-potential curves of  $\text{Fe}_2\text{O}_3@\text{Ni}(\text{OH})_2$  with deposition time of  $\text{Ni}(\text{OH})_2$  for 5 min (a) and 10 min (b) under illumination with different light intensities.

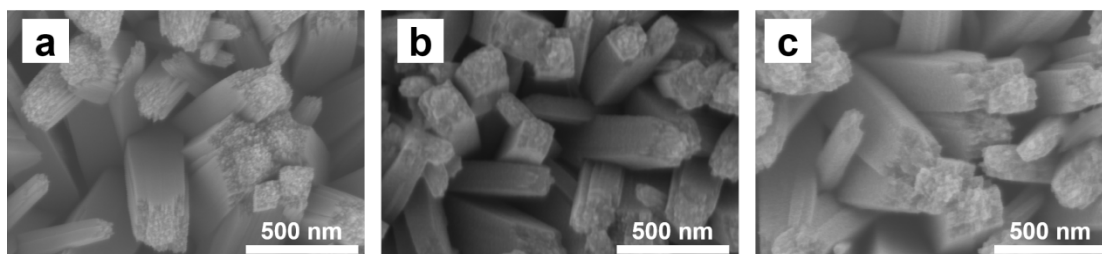

**Fig. S5** Surface SEM images of bare  $\text{TiO}_2$  (a) and  $\text{TiO}_2@\text{Ni}(\text{OH})_2$  with deposition time of  $\text{Ni}(\text{OH})_2$  for 5 min (b) and 10 min (c).

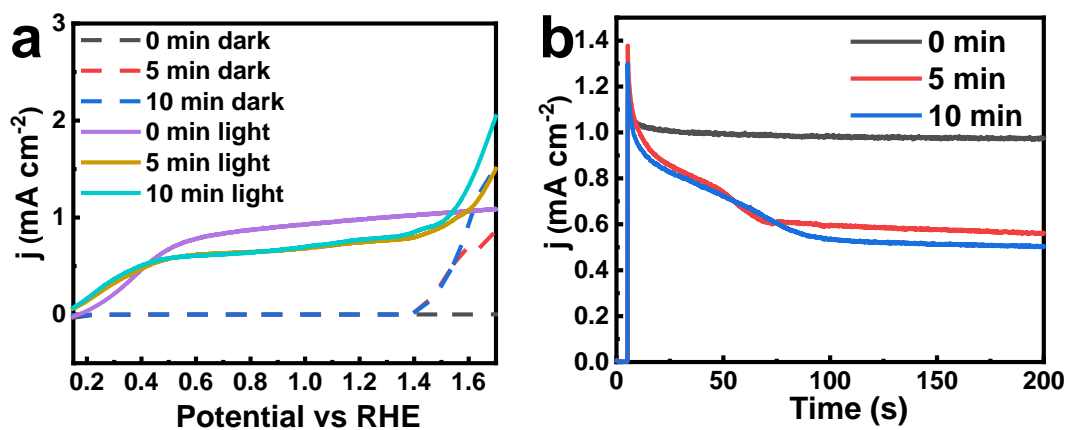

**Fig. S6** (a) Dark current-potential and photocurrent-potential curves of bare  $\text{TiO}_2$  and  $\text{TiO}_2@\text{Ni}(\text{OH})_2$  with deposition time of  $\text{Ni}(\text{OH})_2$  for 5 min and 10 min; (b) I-t curves at 1.1 V<sub>RHE</sub> of  $\text{TiO}_2@\text{Ni}(\text{OH})_2$  with deposition time of  $\text{Ni}(\text{OH})_2$  for 10 min under illumination with different light intensities. Electrolyte: 1M KOH aqueous solution.

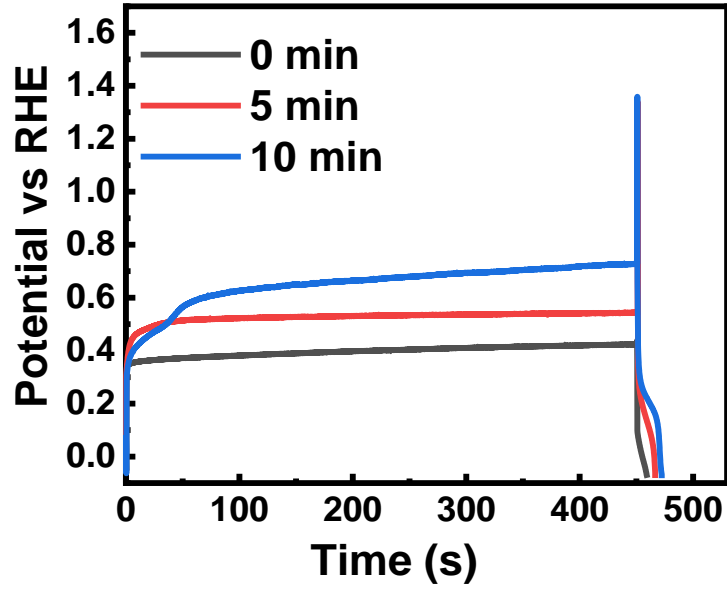

**Fig. S7** Galvanostatic photo-charge at  $0.6 \text{ mA cm}^{-2}$  and dark-discharge curves of bare  $\text{TiO}_2$  and  $\text{TiO}_2@ \text{Ni(OH)}_2$  with depositon time of  $\text{Ni(OH)}_2$  for 5 min and 10 min

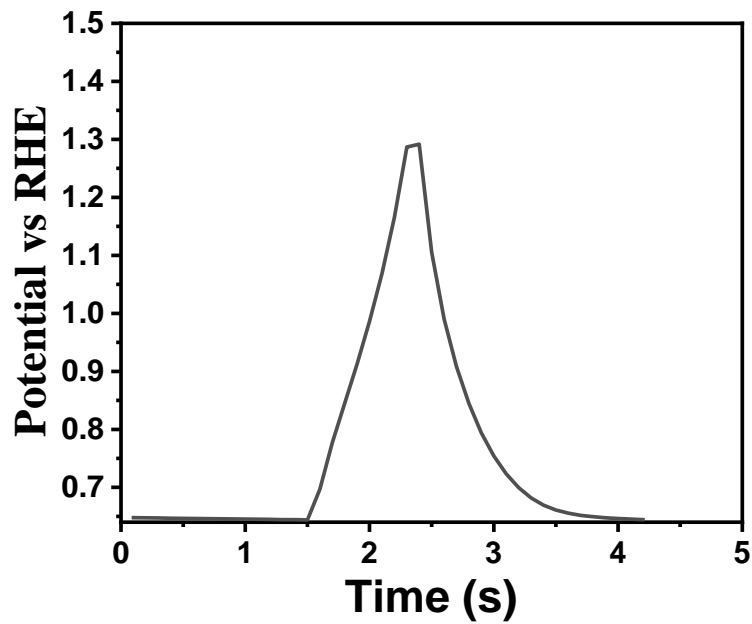

**Fig. S8** Galvanostatic dark charge and discharge curves of  $\text{Fe}_2\text{O}_3@ \text{Ni(OH)}_2$  with depositon time of  $\text{Ni(OH)}_2$  for 10 min.

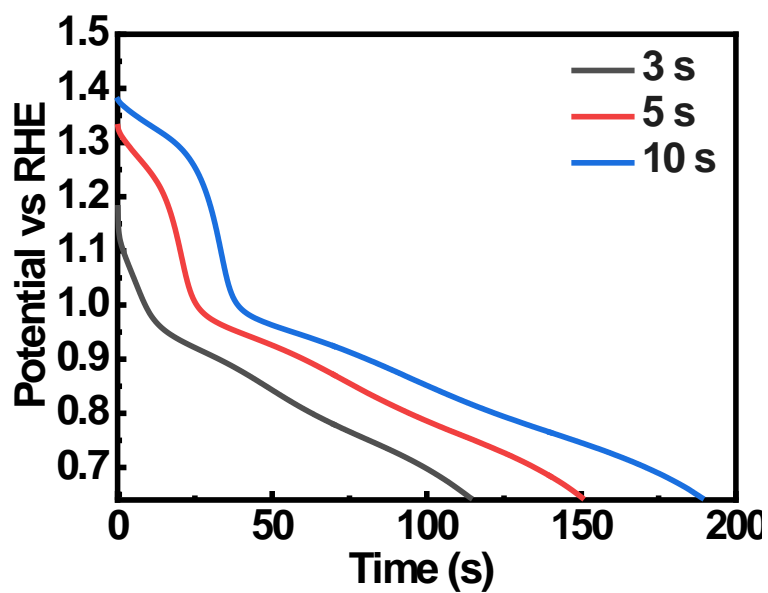

**Fig. S9** Discharge curves at current density of  $0.1 \text{ mA cm}^{-2}$  of  $\text{Fe}_2\text{O}_3@\text{Ni}(\text{OH})_2$  with deposition time of  $\text{Ni}(\text{OH})_2$  for 10 min after photo-charge at  $1.35 \text{ V}_{\text{RHE}}$  for different times.

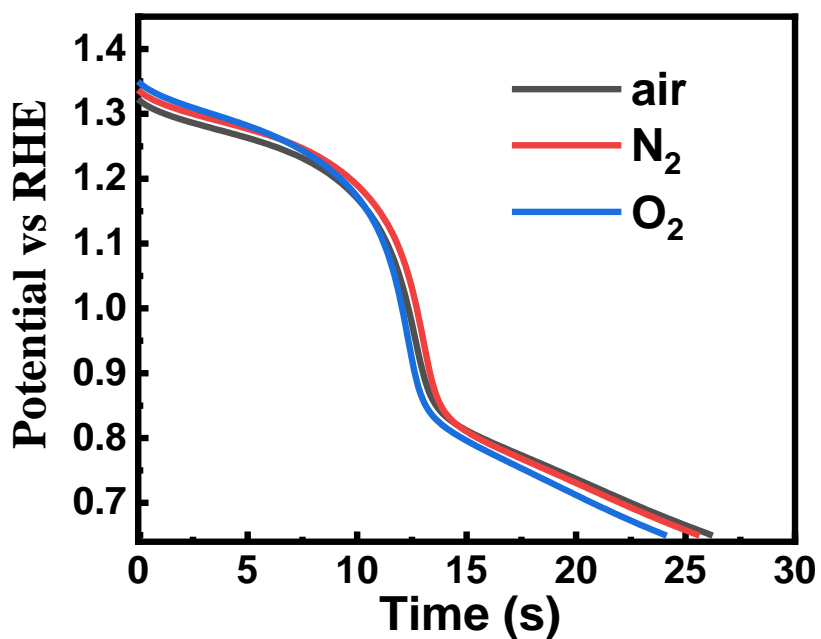

**Fig. S10** Discharge curves ( $0.6 \text{ mA cm}^{-2}$ ) of  $\text{Fe}_2\text{O}_3@\text{Ni}(\text{OH})_2$  with deposition time of  $\text{Ni}(\text{OH})_2$  for 10 min at different atmosphere.

Table S1 The performances of different photo-capacitors in this study and literatures

| Photoelectrochemical | Specific capacitance | Reference |
|----------------------|----------------------|-----------|
|----------------------|----------------------|-----------|



1. X. Xu, S. Li, H. Zhang, Y. Shen, S. M. Zakeeruddin, M. Graetzel, Y. Cheng and M. Wang. *ACS Nano* 2015, 9, 1782-1787.
2. S. Safshekan, I. Herraiz-Cardona, D. Cardenas-Morcoso, R. Ojani, M.Haro, S. Gimenez. *ACS Energy. Lett.* 2017, 2, 469-475.
3. J. Xu, H. Wu, L. Lu, S. Leung, D. Chen, X. Chen, Z. Fan, G. Shen and D. Li. *Adv. Funct. Mater.* 2014, 24, 1840-1846
4. J. Xu, Z. Ku, Y. Zhang, D. Chao and H. J. Fan. *Adv. Mater. Technol.* 2016, 1, 1600074
5. X. Chen, H. Sun, Z. Yang, G. Guan, Z. Zhang, L. Qiu and H. Peng. *J. Mater. Chem. A*, 2014, 2, 1897-1902
6. Y. Fu, H. Wu, S. Ye, X. Cai, X. Yu, S. Hou, H. Kafafy and D. Zou. *Energy Environ. Sci.* 2013, 6, 805-812.
7. F. Zhou, Z. Ren, Y. Zhao, X. Shen, A. Wang, Y. Y. Li, C. Surya and Y. Chai. *ACS Nano* 2016, 10, 5900-5908
